# Supplementary material for: An understandable approach to the temperature dependence of electric properties of polymer-filler composites using elementary quantum mechanics
Source: publisher site journal article supplement (doi:10.1515/cti-2020-0014), 2021-05-28
Supplement: Supplementary file 1 [file j_cti-2020-0014_suppl.docx]

**Supporting Information**

**Understandable approach about temperature dependence of electric properties of filler-polymer composites leading to elementary quantum mechanics in terms of educational aspects**

**Matsuo, M.*1**; Zhang, R*2* ; Bin, Y. 1**

***1***Department of Polymer Science and Materials, Dalian University of Technology,

Dalian 116024, China ***2***Hubei Provincial Key Laboratory of Green Materials for Light Industry, Hubei University of Technology, Wuhan, 430068, China

* mm-matsuo@live.jp

**This Supporting Information concerning the manuscript**

**is for the special of “Polymer Education”**

**Supporting Information**

On mentioning the teaching procedure politely, most of the detailed mathematical treatments are described in Supporting Information I ~ IV, since the authors wish that this paper shall be referenced as lecture note for graduate students who are not good at formulas. The comparison between experimental and theoretical results is represented in Supporting Information V.

**Supporting Information I**

(7)

As discussed in a number of textbooks, Eq. (7) in the paper contains both properties of particles and waves.

The differentiation of Eq. (7) with respect to *x* is given by

(SI-1)

By using the operator,

(SI-2)

By differentiating Eq. (7) with respect to *t*, *E* is given by

(SI-3)

Eq. (SI-3) reveals that the energy *E* of wave mechanics corresponds to the operator .

Given the difficulties noted already, the instructors need to emphasize that Schrödinger wave function is an equation formulated only by replacement of , *k* = = *p*/ (*λ*= *h*/*mu* =/*p*) as discussed in the paper. To pursue this approach, we now consider an example for kinetic energy:

(SI-4)

Considering potential energy *U*, the total energy *E* in one-dimensional problem is given by

*u*2 (SI-5)

By applying the operator to the both sides of Eq. (SI-5), we get

(SI-6)

The square brackets is termed as the Hamilton operator *H*, which is written by

　　　　　　　　　　 (SI-7)

Rearranging Eq. (SI-6), the following differential equation can be formulated.

　　　　　(SI-8)

By variable separation of , Eq. (SI-8) is described as

(SI-9)

Thus, Eq. (SI-8) can be rewritten as follows:

(SI-10)

The left side of Eq. (SI-10) is given by a function of *x*, while the right side is given by a function of *t*. Hence the value of Eq. (SI-10) must be constant and the constant can be represented as; here *E* is an arbitrary constant at present but is confirmed to stand for the total energy. The left and right sides may be represented by

(SI-11)

(SI-12)

The solution of Eq. (SI-12) as a function of *t* is given by

(SI-13)

where *go* is constant.

Eq. (SI-11) relating to the position *x* has been known as the Schrödinger wave function generally. The instructor has to emphasize that de Broglie wave is a travelling wave, since the quantum particle (electron) is locked in a very small volume like an atom. Hence the corresponding de Broglie wave can be treated as a standing wave whose amplitude depends on a function of position.

**Supporting Information II**

WKB approximation and Airy function

Let’s consider potential function of *U*(*x*) as a function of *x* and expand *U*(*x*) around *U*(*x*o) = *E* as follows:

(SII-1)


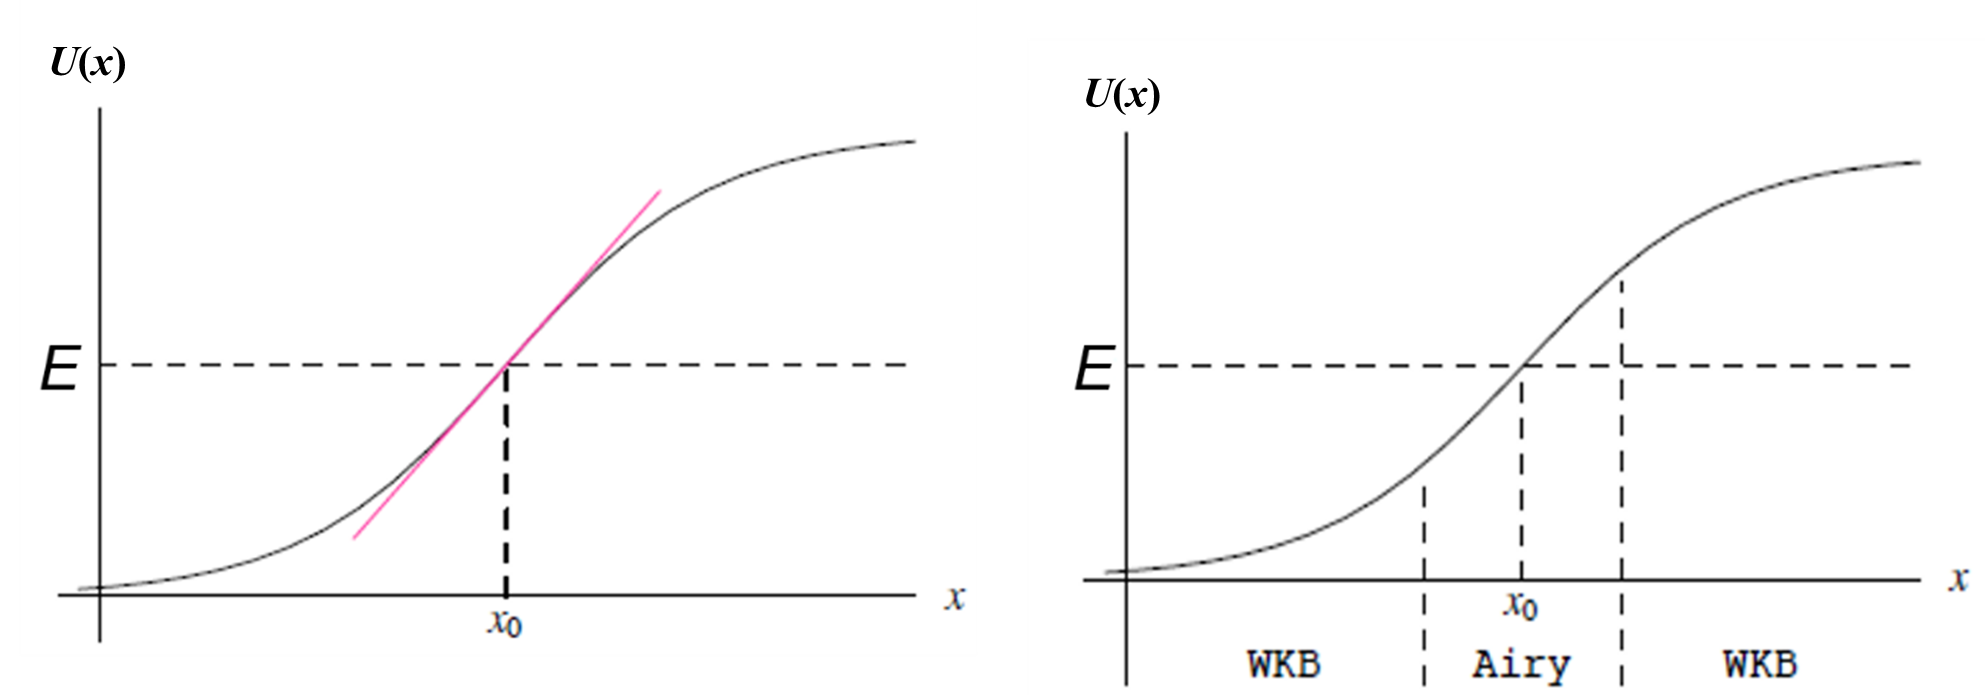


(a) (b)

Figure S1. (a) The expansion of potential function of *U*(*x*) around the turning point *x*o.

(b) Connection of asymptotic forms of *Ai*(*x*) and *Bi*(*x*) at left and right sides at *x*o.

To linearize potential curve, the Schrödinger equation is given by

(SII-2)

where

　　　　　　　　　　(SII-3)

Let’s derive Airy function from the Schrödinger equation.

( (SII-4)

Again, writing *f*(*z*) as, the transformed Schrödinger equation is given by

(SII-5)

The above 2nd order differential equation is termed as the Airy function with turning point where the solution changes from vibration mode to exponential one. The asymptotic forms for Type 1 Airy function *Ai*(*z*) and Type 2 Airy function *Bi*(*z*) are given by

(SII-6)

(SII-7)

The behavior of *Ai*(*z*) and *Bi*(*z*) are shown in Fig. S-2.

Figure S2. Airy function of *Ai*(*z*) and *Bi*(*z*)

Here, let’s explain the derivations of Eqs. (SII-6) ~ (SII-7).

First of all, substituting Fourier transform of into Eq. (SII-4),

The second term is given by using as follows:

The above induction is carried out by assuming the disappearance of surface term , which is reasonable for convergence of Fourier transform. Thus the Airy differential equation is rewritten as follows:

Thus

The solution is

And then

Selecting normalized constant as , the Airy function (real part) is given as follows.

Considering the symmetry of integrand and selecting real part, *Ai*(*z*)is given by Eq. (SII-6) described above.

As for Eq. (SII-7):

Let’s consider the behavior of *Ai*(*z*) at z > 0 asymptotic to zero, while at z < 0, it provides vibration with decreasing the magnitude. Because of the complicated integrand, *t* is expanded to complex plane for considering the change of integration path.

By using integration path *C* on the complex plane,

By the integration of the first term, the above equation becomes

Accordingly,

is the difference of *g*(*t*) between start point and end point and corresponds to difference after one round for closed curve, in which(*v*o : arbitrary constant).　Accordingly,

is non-singular and becomes in the case where *C* is closed curve, which is meaningless because of *f*(*t*) = 0. In the case where *C* is open curve, the values of at start point and end point must be equal.

Now, at

When ,

I : , II : , III :

In the above regions, at and then

Accordingly, is satisfied, when *C* is set as like that the both ends are extended to infinity at.

Figure S-3 shows the tolerance at representing gray zones.

Figure S3. Tolerance at representing gray zones indicating integration path.

Curve C1: starting and end points exited at infinity on Regions II and I, respectively

Curve C2: starting and end points exited at infinity on Regions I and III, respectively

Curve C3: starting and end points exited at infinity on Regions III and II, respectively

Following mathematical textbooks, the both ends of open curve exist on somewhere in Region I or II or III as shown in Fig. 3S and the both ends in each Region are connected with route *D*. This means that for closed curve *C* + *D*, the integration of *C* + *D* is zero according to Cauchy’s theorem. Also *D* being set at infinity is not contributed to the integration because of on *D* and then is established. Thus the both ends in *C*i (*i* = 1,2 3) must be set at different Regions.

To pursue integration along the routes *C*1, *C*2 and *C*3, the both ends existed at each region must be connected by the route *D*1, *D*2 and *D*3. In this case, becomes a closed curve and the individual integration for *D*1, *D*2 and *D*3 become zero. Hence

And then

where

1, 2, 3

where .

Among *f*1(z), *f*2(z), *f*3(z), independent solutions are two. By moving *C*1 along real axis,

Also, *C*2 can be replaced with the line with slope of .

From ,

Also, *C*3 can be replaced with the line with slope of . Then,

Then,

Considering

Representing,

Assuming , . Thenis the solution of the above differential equation. Among and , there exist two linearly independent solutions. Then, can be defined as

When *z* is real number,is real number. Hence *Bi*(*z*) is represented as

Therefore the general solution *f*(*z*) is given by arbitrary coefficient *F* and *G*as follow:

　As another concept based on the convergence of integral, it should be noted that there exists region admitted as integration path below the *z* axis. This concept is slightly simple than the method discussed above, which is the integration by using this route. Even so, the integration by using this route assures that the Airy functions satisfy the differential equation. Thus,

The imaginary part of the above equation corresponds to *Bi*(*z*) shown in Eq. (SII-7). That is,

At z < 0, the both functions *Ai*(*z*) and *Bi*(*z*) vibrate around 0. At region of, the vibration gets faster and the magnitude decays. The asymptotic form is given by

(SII-8)

(SII-9)

At z > 0, *Ai*(*z*) decays to zero exponentially, while *Bi*(*z*) with positive value tends to increase exponentially. The asymptotic form at region of is given by

(SII-10)

(SII-11)

Accordingly, the general solution of by using the Airy functions *Ai*(*z*) and *Bi*(*z*) is given by using arbitrary coefficients *G* and *F* as follows:

(SII-12)

The asymptotic form concerning region at is given by

(SII-13)

At

(SII-14)

These asymptotic forms provide good approximation at . As described in the paper already, the condition is as follows:

(SII-15)

The region to establish the WKB approximation is shown in Fig. 4c. In Region I on the left side, the approximate solution of Eq. (30) can be used, while in Region II on the right side, the approximation solution of Eq. (35) can be used. Then, the trial for linear approximation of potential is used across the region constructing the WKB approximation. The solution of the transformed Schrödinger equation is represented as the Airy function and the WKB approximation solutions in Regions I and II can be connected through the asymptotic forms.

Let’s consider appeared in the asymptotic forms of the Airy function. Replacing and , *z* is given by

(SII-16)

From Eq. (SII-2) and Eq. (SII-3),

(SII-17)

Hence,

(SII-18)

Using Eq. (29) and Eqs. (SII-16) ~ (SII-18),

(SII-19)

Hence, at *x* < *a*

　（SII-20）

The above equation corresponds to Eq. (30).

Similarly, at *x* > *a*,

　　　　(SII-21)

The above equation corresponds to Eq. (35). The connection condition between and can be represented as Eq. (36) on the basis of the approximation solutions at the region containing the turning point.

(36)

Here, let’s induce Eq. (36). The approximation solutions at the region containing the turning point represent Eq. (SII-14) at *x* < *a* and Eq. (SII-13) at *x* > *a*. From Eq. (SII-14) and Eq. (SII-13), and are rewritten as follows:

*x* < *a*

(SII-22)

*x* > *a* (SI-23)

Comparing Eq. (SII-20) with Eq. (SII-22) and Eq. (SII-21) with Eq. (SII-23), the relationship between coefficients of the WKB approximation and the coefficient of linear approximation solutions are obtained as follows:

Thus, the coefficients of the WKB approximation at Region I and Region II can be combined and then Eq. (36) can be deduced.

(36)

Replacingandin Eq. (SII-20) byandin Eq. (II-21), is rewritten by

(SII-24)

, which is represented by Eq. (SII-24), is the WKB approximation solution in Region I connected with the solution of in Region II.

Furthermore, by using, is rewritten by

(SII-25)

where

By using Eq. (36),

**Derivation of Eqs. (43) ~ (45)**

Let’s analyze wave functions concerning Region II and Region III.

At *x* < *b*, (Region II)

　（43）

Instead of Eq. (35) using coefficients, Eq. (43) using the coefficients are defined to make clear the connection between Region II and Region III.

Similarly, at *x* > *b*, (Region III)

(44)

The connection between Eq. (43) with coefficients in Region II and Eq. (44) with coefficient in Region III can be achieved using the same procedure for the connection between Region I and II. As shown in Fig. 4d, the inverse relationship associated with downward-sloping curve must be taken in consideration.

By using the Airy functions shown in Eqs. (SII-8) ~ (SII-11), the transformed Schrödinger equation is represented again as follows:

Judging from Fig. 4d, the asymptotic form at region at is given by

(SII-26)

At

(SII-27)

Let’s consider appeared in the asymptotic forms of Airy function again. Replacing and , *z* is given by

(SII-28)

As describe already,

(SII-29)

Hence,

(SII-30)

Using the same method as Eq. (SII-19),

(SII-31)UU

The asymptotic form of region atis given by

(SII-32)

Hence is given by

(SII-33)

At

(SII-34)

From relation to Eq. (43) and Eq. (SII-33) at *x* < *b*,

Then,

(SII-35-1)

(SII-35-2)

Similarly, based on the relationship between Eq. (44) and Eq. (SII-34) at *x* > *b*,

(SII-36-1)

(SII-36-2)

Using Eqs. (II-35) and (II-36),

(SII-37-1)

(SII-37-2)

Considering travelling wave at *x* > *b*, . Then,

And then,

(SII-38)

By using the method similar to Eq. (SII-25),

(SII-39)

Thus,

Finally,

　（SII-40）

**Supporting Information III**

**Evaluation of tunnel current at absolute temperature**

The complicated analysis of tunnel current by Simmons [10] is done by using Eq. (56) and then this chapter introduces current-voltage relationship. To pursue the analysis, the potential barrier height *U*(*x*) is represented as by using Fermi level and potential barrier function as shown in Fig. 5. Thus Eq. (56) is given by

(SIII-1)

According to the very nice approximation by Simmons [10], Eq. (SIII-1) is approximated as follows:

　　　　 (SIII-2)

where is the means barrier height above Fermi level of the negatively biased electrode and is given by

(SIII-3)

and

(SIII-4)

where .

Following Simmons, is proposed to be unity as a good approximation except high voltage range. [10]

　The derivation of Eq. (SIII-2) from Eq, (SIII-1) can be achieved by setting the following arbitrary function for integration.

Then, is given by

Usually,

Accordingly, , and then

Thus the equation (Eq. (III-2)) can be induced by using as follows:

Now, let’s consider how to deviate Eqs. (73) ~ (75) from Eq. (71).

Considering characteristics of Fermi-Dirac function at *T* = 0oK, is given by

　　　　　　　(SIII-5-1)

(SIII-5-1)

Hence,

(SIII-6-1)

(SIII-6-2)

(SIII-6-3)

Substituting Eqs. (SIII-2) and (SIII-6) into Eq. (71), tunnel current density *J* at absolute temperatureis given by

　 (SIII-7-1)

To facilitate the integration, Simmons rewrote Eq. (SIII-7-1) as follows:

(SIII-7-2)

In Eq. (SIII-7-2), three terms are given by

The first term:

The above final term is due to

The second term:

The third term:

By summation of the three terms, Eq. (SIII-7-1) is formulated as general equation about tunnel current density as follows:

(SIII-7-3)

where

　The first and second terms of Eq. (SIII-7-3) correspond to a current density flowing from the electrode 1 to the electrode 2 and a current density flowing from the electrode 2 to the electrode 1, respectively. When *V* is zero, the net current density becomes zero.

Now, let’s classify Eq. (SIII-7-3) into three cases, low voltage range (Case I), intermediate range (Case II) and high voltage range (Case III) in accordance with Fig. S3 proposed by Simmons [10].

In Case I, *eV* is close to zero as shown in Fig. S3(a).

(SIII-8)

Expanding and neglecting terms containing *V*2 and higher orders, Eq. (SIII-8) becomes

(SIII-9)

Since , Eq. (SIII-9) is expressed by

　　(SIII-10)

As shown in Fig. S3a, *V* is almost close to zero and then potential barrier becomes rectangular and. Then and . Accordingly, Eq. (SIII-10) reduces to

　　(SIII-11)

Setting the insulation film area as *S*, tunnel current *I* becomes *I* = *JS* and tunnel resistance *R* becomes *R* = *V*/*I*.


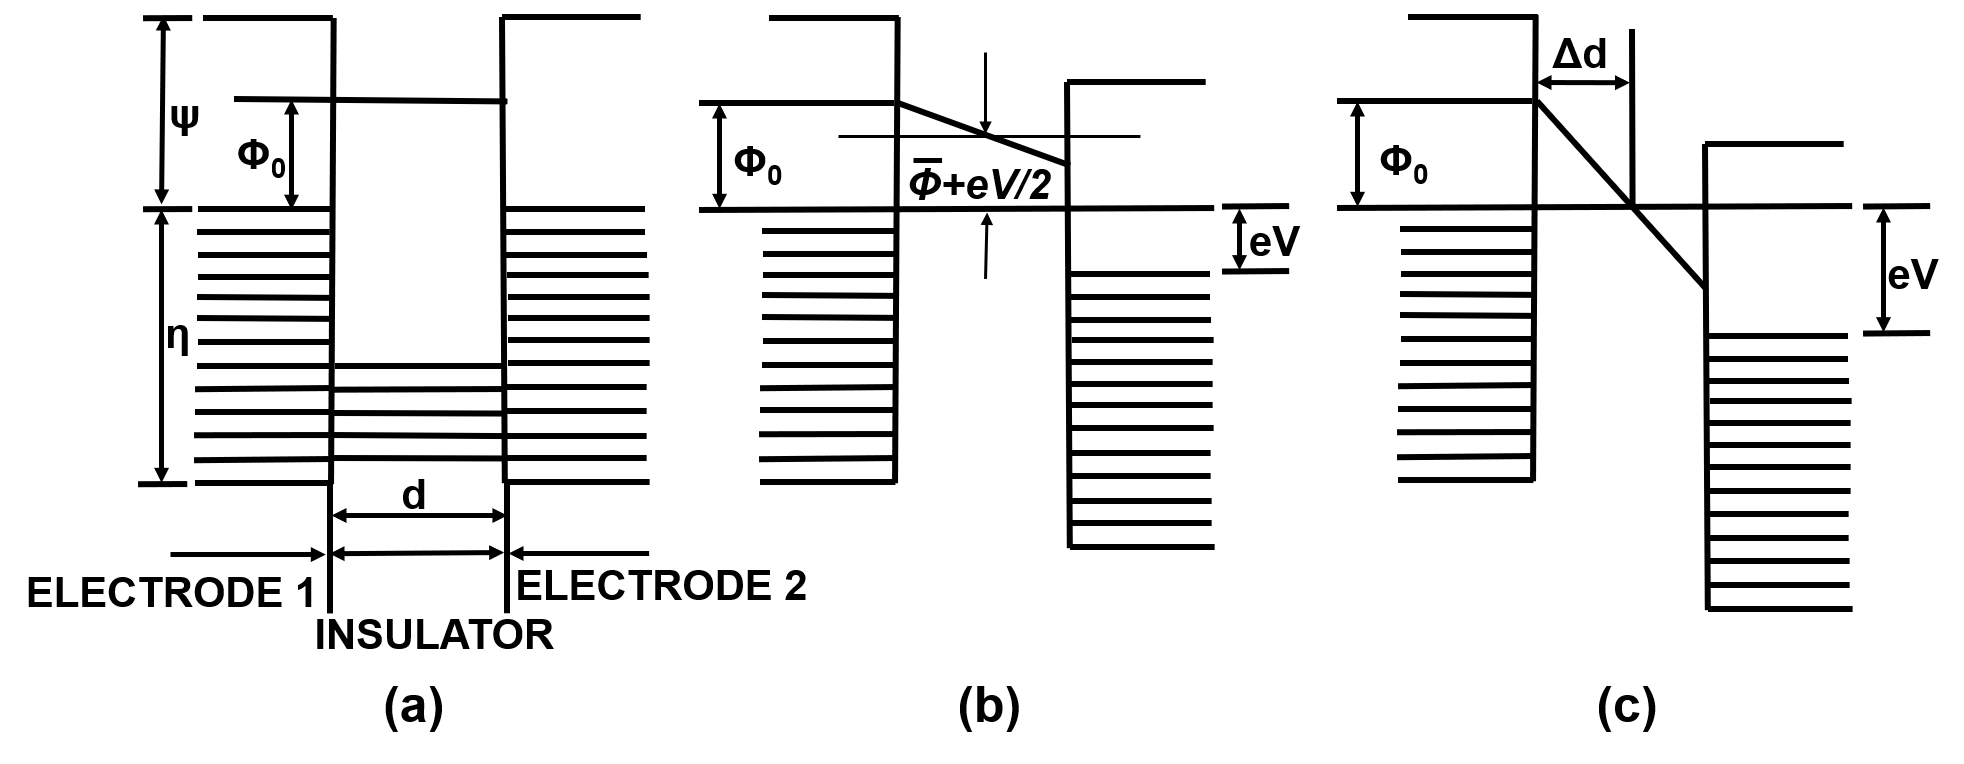


Figure S3 (a) low voltage close to *V* = 0, (b) intermediate voltage, (c) high voltage

Case II (intermediate voltage range) : , and ,

Figure S3(b) with is well-known diagram published in many textbooks and corresponds to intermediate voltage range (Case II). The different Fermi levels *eV* between the electrodes 1 and 2 provides transfer of electron current through insulator. By assuming inclined rectangular potential to be flat rectangular potential, the height of potential barrier function becomes. Different from Fig. 5,  is set to simplify mathematical treatment, which is slightly out of the framework associated with the image potential.

Substituting and into Eq. (SIII-7), Eq. (SIII-7) is rewritten as

(SIII-12)

Setting and by permission of a few percent error, Eq. (SIII-12) becomes

　　　 (SIII-13)

Comparing with Eq. (SIII-12), the error by Eq. (SIII-13) is less than few percent at , which is confirmed by Simmons. [10]

To reduce the error, can be defined as by considering image force by Simmons and the similar form by Sheng. [11] But the calculation becomes very complicated and the method is given in Supporting Information IV. Incidentally, the image force by Simmons is given by [10]

　　　　　 (SIII-14)

where *u* = *x/d*.

More realistic method is discussed in detail in Supporting Information IV using the method proposed by Sheng. [11]

For high voltage range (Case III),

The following relationship can be constructed on the basis of Fig. S3(c).

At , and .

Then, Eq. (SIII-7-3) can be rewritten as follows:

(SIII-15)

where *F* is the field strength in the insulator given by *F* = *V*/*d*

Following Simmons [10], and then Eq. (SIII-15) is rewritten as:

(SIII-16)

**Supporting Information IV**

**Mathematical evaluation of temperature dependence of tunnel current**

This part mainly supports derivation of many equations in Chapter IV and parameter fitting method in Eq. (83) to cultivate a better understanding tunnel current.

Following Sheng, [11] the tunneling current density for a junction is given by

(SIV-1)

This is similar to Eq. (71). is termed as Fermi-Dirac function and *k*// is the wave vector of the electron parallel to the junction surface. *E*// is given by. As discussed in Section III, corresponds to the barrier transmission factor given by Eq. (56), which is given as by Sheng. [11] The integration of Eq. (SIV-1) is slightly difficult. To pursue the integration, the following mathematical formula is needed. The procedure based on direct heartwarming guidance by Sheng is described as follows:

where is a dimensionless number and . is a number >> 1 whose precise value does not matter. Following his kind suggestion about , *kT* is at most 25 *meV* at room temperature and then its value should always be much smaller than the Fermi energy. So taking the upper limit of *x* to be >>1 can be an accurate approximation.

As for integral for the second term in Eq. (SIV-1), the same method can be used by replacing *b* to be .

Accordingly, Eq. (SIV-1) is given by

(SIV-2)

As for the approximation about

*E* > 0, ,

*E* < 0, ,

As for the approximation about

, ,

, ,

=0, *E* > 0

Accordingly Fermi-Dirac function is given by

Now, let’s define as follows:

(SIV-3)

Accordingly, Eq. (SIV-2) is represented by

(SIV-4)

where

(SIV-5)

The barrier transmission factor representing as in Sheng’s paper [11] based on the strict handling, is given by

(SIV-6)

where

(SIV-7)

is the tunneling constant and *u*1 and *u*2 are the zeros of the integrated.　The important point is the fact that when , the WKB approximation, which is introduced in Supporting Information II, provides a transmission factor which connects smoothly to and approaches the unity at large *E* asymptotically. In accordance with Exercise concerning Eq. (16), Eq. (SIV-6) reduces to simple mathematical forms with very little error as follows:

(SIV-8)

Let’s consider Eq. (SIV-8) in comparison with Eq. (56) at *u*1 = *a* and *u*2 = *b*.

The above equation is slightly different from Eq. (56), since *V*(*x*) in Eq. (56) listed in many textbooks is given by an arbitrary function of potential barrier at absolute temperature as shown in Fig. 4(a), different from in Eq. (81), while is slightly dependent upon temperature as discussed later.

　As described by Sheng, at *U*max > 0 、the barrier transmission probability decreases rapidly below *E* = 0, and it is reasonable to approximate by the first two terms of the power series expansion about *E* = 0.

(SIV-9)

where

(SIV-10)

and

(SIV-11)

where *u*3 and *u*4 (> *u*3) denotes the two zeros of which is different from *u*1 and *u*2 relating to the zeros of the integration of Eq. (SIV-7).

Substituting Eqs. (SIV-8) ~ (SIV-11) into Eq. (SIV-4), Eq. (SIV-4) reduces to

(SIV-12)

Because of rapid decrease of the barrier transmission probability in the vicinity of , at *U*max > 0 () is approximately given by Eq. (SIV-13) in stead of Eq. (SIV-5) without incurring much error.

(SIV-13)

And then, Eq. (IV-12) reduces to

(SIV-14)

For *Um* < 0 , the current density is given by

(SIV-15)

By expanding in a power series about *Um*,

(SIV-16)

where

(SIV-17)

and *u** denoting the location of *Um*, satisfies the following equation.

(SIV-18)

As pointed by Sheng, always holds for *Um* < 0, in Eq. (SIV-15)　is replaced by Eq. (IV-13) neglecting the interval. That is, at *Um* < 0 (),

(SIV-19)

By the numerical calculations, Sheng indicated that the variation of *Um* (for *Um*< 0) as a function of can be approximated as the following relationship.

　　　　　　 (SIV-20)

Substituting Eq. (SIV-20) into Eq. (SIV-19), at can be represented as follows:

(SIV-21)

Through a series of procedures, the final forms of tunnel current density at and are represented as follows:

(SIV-22)

and

(SIV-23)

where

(SIV-24)

(SIV-25)

Following Sheng [11], the value ofis noted to be continuous at and the relation holds from the definitions of . Using, partial conductivity atand can be obtained to calculate the fluctuation-induced tunneling conductivity by using Eq. (79)’ and (80)’.

At

(SIV-26-1)

where

(SIV-26-2)

And

(SIV-27)

and then

(SIV-28)

where .

As pointed by Sheng, the calculation of the junction conductivity must involve thermal averaging as expressed by Eq. (SIV-28). By replacing as ,

(SIV-29)

where

(SIV-30)

(SIV-31)

(SIV-32)

where and .

**Pre-discussion for Parameter fitting**

Eq. (SIV-29) corresponds to Eq. (83). Let’s consider how to determine important parameters *d* and *A* through the fitting with experimental result by using Eqs. (SIV-29)~(SIV-32). We shall refer to the conventional method adopted by Sheng [11].

At the first onset, the functions and are plotted in Fig. S4. According to schematic diagram, the functions and revealed that at values of in Eq. (83) (Eq. (SIV-29)), the tunneling probability increases faster with increasing field, while the fluctuation probability decreases. As the results, the summation of the two factors shows a dashed curve. The profile goes through a maximum at some value


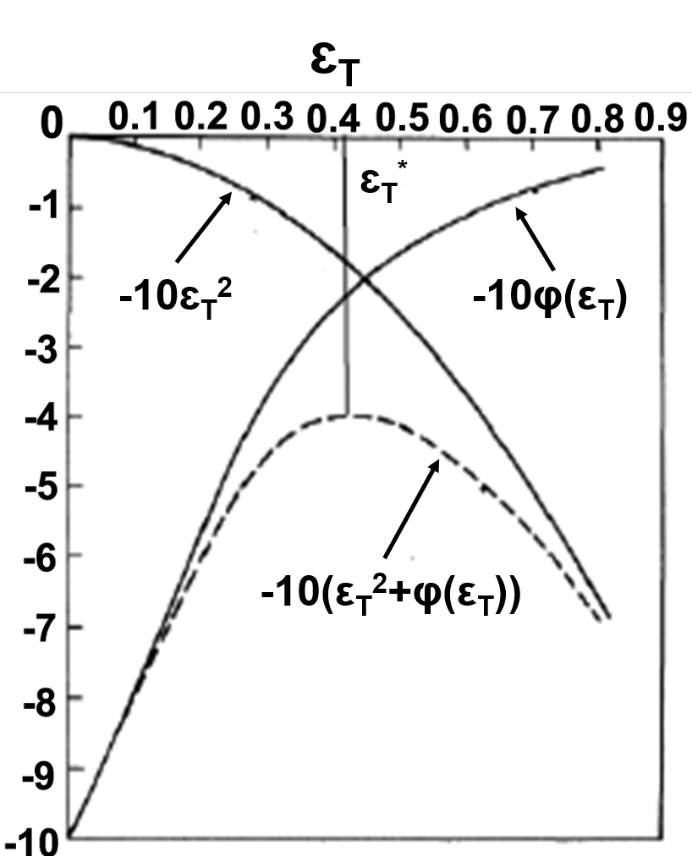


Figure S4. The increase in the tunneling contribution as a function of , expressed by

, is opposed by the decrease of the fluctuation probability, expressed by . The maximum that obtains from the sum of these two terms represents the best compromise between the two tendencies. The function is calculated with . (quoted from Re. [11] of Sheng)

The existence of a maximum in the exponent implies that the integrand of the first integral in Eq.（IV-29）is sharply peaked. Following Scheng [11], it is expected that the temperature dependence of conductivity would be dominated by the variation of . In anticipation of this fact, is given by

(SIV-33)

where is defined as

(SIV-34)

Eqs. (SIV-33) and SIV-34) are very important for parameter fitting.

**Supporting Information V**

**Support evaluation of tunnel current by impedance**

Here it may be pointed out why vapor grown carbon fiber (VGCF) similar to carbon fiber (CF) is selected as filler in polymer matrix in comparison with carbon black (CB). Theory by Sheng is concentrated on tunnel current mainly at low applied field. As preliminary experiments, the conductivity of CB-polyethylene (PE) and CF-PE composites were measured, which is shown in Fig. S5. The conductivity of CB-PE with 25 vol% content is lower than that CF-PE with 15 vol% content. To obtain the exact value of conductivity under low electric field, CF-polymer composite is better than CB-polymer composite. Furthermore, it was impossible to achieve uniform dispersion of high content CB powders in PI matrix. This is the reason that VGCF is selected as the fillers. Incidentally, the conductivity PE/CNT shows temperature independence because of tight entanglements of CNTs. [3]


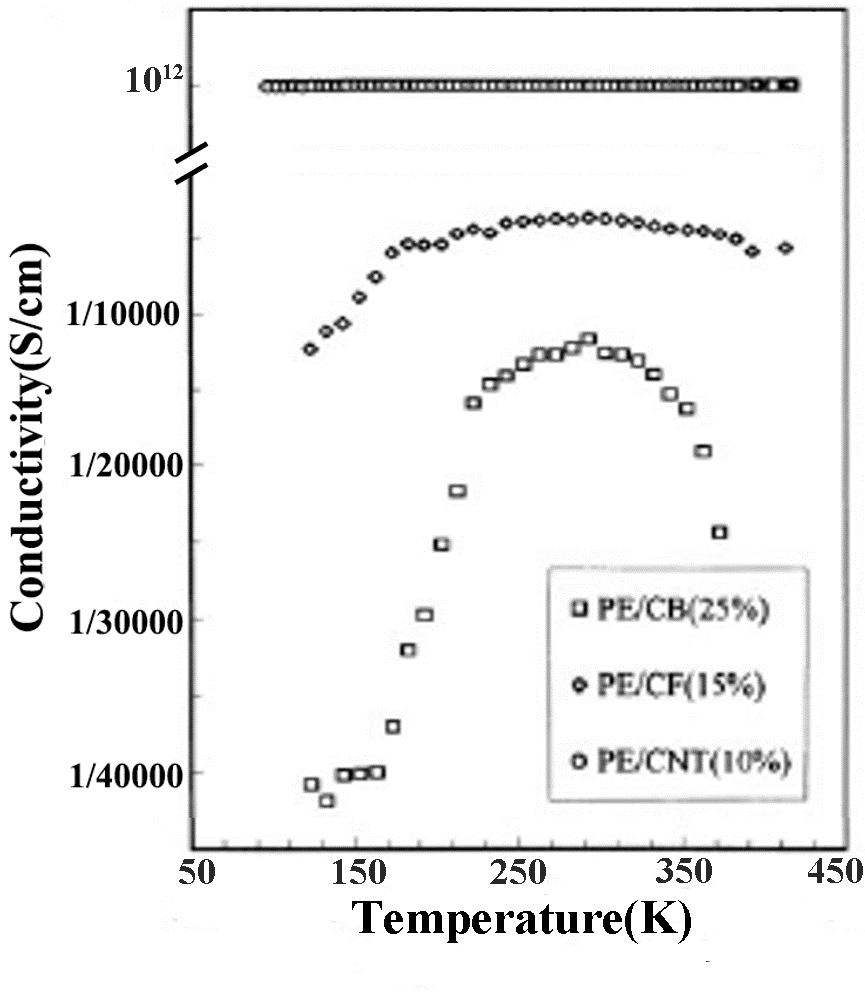


Figure S5. Temperature dependence of conductivity of polyethylene/carbon-fiber (PE/CF) composite with 15 vol% content of CF, PE/carbon black (CB/PE) composite with 25 vol% content of CB and PE/flexible carbon nanotube (CNT/PE) composite with 10 vol% content of CNT.

Let’s consider justice as to why general tunnel current theory can be applied to PI/VGCF composites though complex impedance *Z**.

For two units as Case I in Fig. 10(a), Eq. (85-1) is classified into two components (*Z*1* and *Z*2*) and for three units as Case II in Fig. 10(b). Eq. (85-2) is classified into three components (*Z*1*, *Z*2* and *Z*3*).

(SV-1)

and

(SV-2)

The optimum values of the parameters concerning resistivity (*Ri*) and capacitance (*Ci*) in Eqs. (85-1) ~ (85-2) (or Eqs. (SV-1)~(SV2)) were obtained by commercially available program to achieve best fitting between the experimental and theoretical results of complex impedance.

As shown in Fig. S6, the fitting between the experimental and theoretical results was carried out on the basis of the frequency dependence of the components *Z*1’*, -Z*1”*, Z*2’*, -Z*2” in a~d for Case I (3.11 vol%) and *Z*1’, *-Z*1”*, Z*2’ *-Z*2”*, Z*3”*, -Z*3” in e~h for Case II (6.28 vol%) under 0.1 and 0.5V. The measurements were performed at 25 oC.


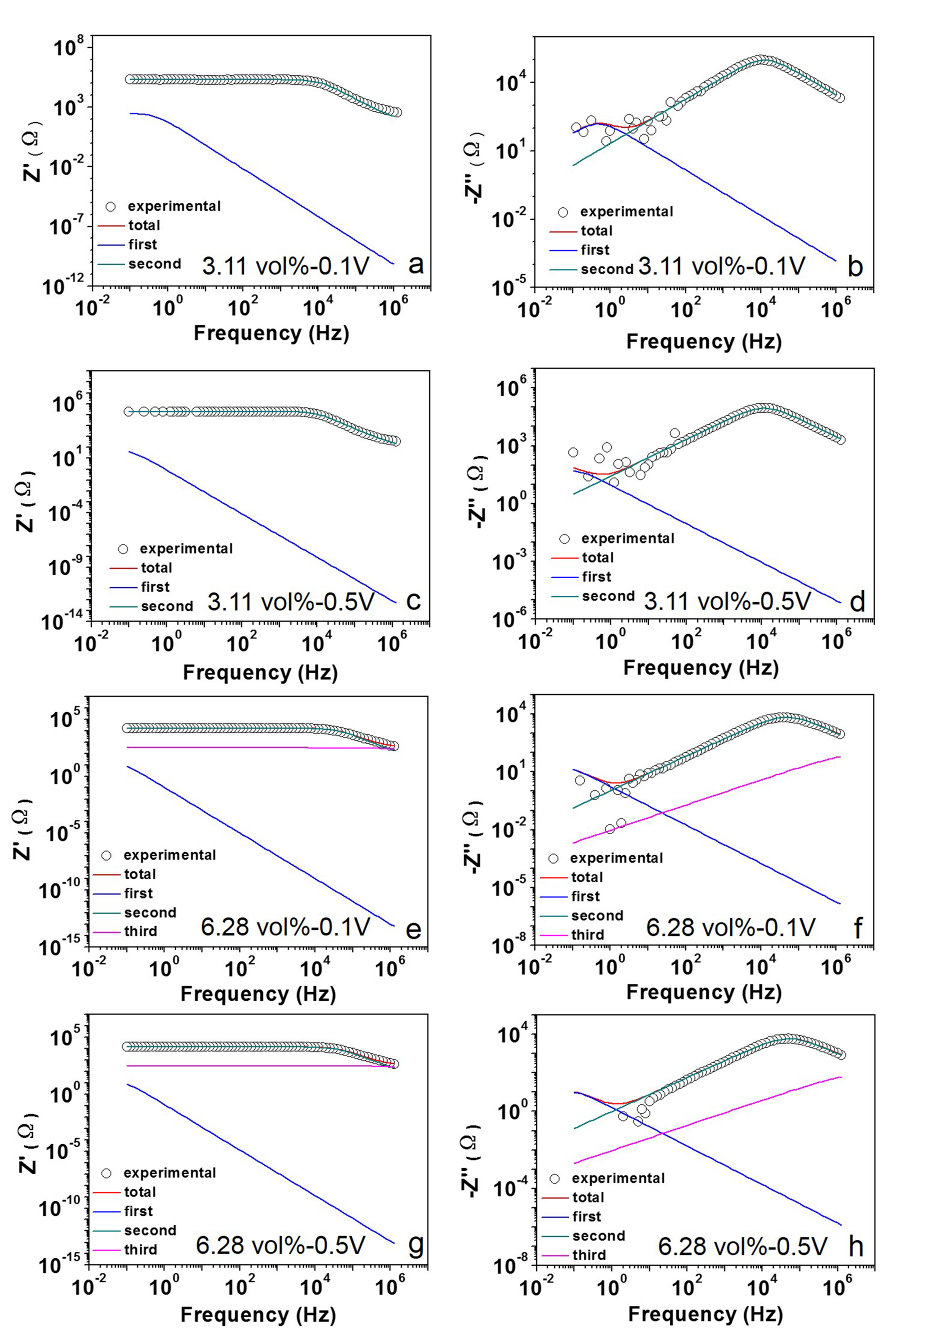


Figure S6. (a), (b), (c) and (d): Parameter fitting between experimental and theoretical results for *Z** for the composite with 3.11 vol% content by using Eq. (85-1) (or Eq. (SV-1)); (e), (f), (g) and (h): Parameter fitting between experimental and theoretical results for *Z** for the composite with 6.28 vol% content by using Eq. (85-2) (or Eq. (SV-2)). Total of *Z’* and *Z*” is the summation of the two terms for the composites with 3.11 vol% content and is the summation of the three terms for the composite with 6.28 vol% content. The same treatments were carried out at 40, 80, 120 and 160oC. [19]

Here it should be emphasized that the parameters of *Z** must be fewer as much as possible on curve fitting. For the composite with 3.11 vol% content, the good agreement could be achieved by two units like Case I, while for the composite with 3.11 vol% content, the three units like Case II must be adopted to achieve the good fitting because of the high content of VGCF.　The real and imaginary parts of frequency dependence of *Z** are strongly affected by the second term *Z*2* in Eq. (85-1) (or Eq. (SV-1)) and in Eq. (85-2) (or Eq. (SV-2)) for the composites with 3.11 and 6.28 vol% contents, respectively. The optimum parameters in the above equations are determined by computer simulation. The results of *Ri*and *Ci* for the composite with 6.26 vol% content under 0.5 V are listed in Table S1. The results for the composite with 3.11 vol% content under 0.1 and 0.5 V are listed in Tables S2 and S3, respectively.

Table S1. The corresponding parameters *Ri* (*i* = 1~3) and *C*i (*i* = 1~3) in Eq. (85-2) (or Eq. (SV-2)) obtained by computer simulation for the composites with 6.28 vol% content under 0.5 V at the indicated temperature. [19]

| T (oC) | 25 | 40 | 80 | 120 | 160 |
| --- | --- | --- | --- | --- | --- |
| *R*1 (Ω) | 20 | 20 | 20 | 20 | 20 |
| *C*1 (F×10-3) | 99.5 | 102 | 109 | 115 | 125 |
| *R*2 (Ω×104) | 1.42 | 1.35 | 1.25 | 1.11 | 1.05 |
| *C*2 (pF) | 990.0 | 1000 | 1040 | 1090 | 1120 |
| *α* | 0.8803 | 0.8800 | 0.8680 | 0.8640 | 0.8650 |
| *R*3 (Ω) | 310 | 308 | 305 | 304 | 300 |
| *C*2 (pF×104) | 3.40 | 3.61 | 3.85 | 3.90 | 4.18 |
| *β* | 0.6548 | 0.6500 | 0.6470 | 0.6504 | 0.6504 |

Table S2. The corresponding parameters *Ri* (*i* = 1~3) and *Ci* (*i* = 1~3) in Eq. (85-1) (or Eq.(SV-2)) obtained by computer simulation for the composite with 3.11 vol% content under 0.1 V at the indicated temperatures. [19]

| T (oC) | 25 | 40 | 80 | 120 | 160 |
| --- | --- | --- | --- | --- | --- |
| *R*1 (Ω) | 300 | 300 | 300 | 300 | 300 |
| *C*1 (F×10-3) | 1.10 | 1.13 | 1.20 | 1.99 | 2.05 |
| *R*2 (Ω×104) | 20.0 | 19.9 | 19.8 | 18.0 | 17.0 |
| *C*2 (pF) | 89.4 | 93.4 | 95.5 | 97 | 110 |
| *α* | 0.970 | 0.965 | 0.960 | 0.955 | 0.950 |
| *B* | 2.031 | 2.036 | 2.042 | 2.047 | 2.053 |

Table S3. The corresponding parameters *Ri* (*i* = 1~3) and *Ci* (*i* = 1~3) in Eq. (85-1) (or Eq. (SV-1)) obtained by computer simulation for the composite with 3.11 vol% content under 0.5 V at the indicated temperature. [19]

| T (oC) | 25 | 40 | 80 | 120 | 160 |
| --- | --- | --- | --- | --- | --- |
| *R*1 (Ω) | 100 | 100 | 100 | 100 | 100 |
| *C*1 (F×10-3) | 17.5 | 25.5 | 40.9 | 41.2 | 47.1 |
| *R*2 (Ω×104) | 19.4 | 18.5 | 18.0 | 17.0 | 16.9 |
| *C*2 (pF) | 128 | 128 | 129 | 130 | 130 |
| *α* | 0.9430 | 0.9471 | 0.9511 | 0.9560 | 0.9360 |
|  | 2.060 | 2.056 | 2.051 | 2.046 | 2.068 |

The effective fractal dimension *B* is related to defined by Nyikos and Pajkossy.

Ref. L. Nyikos, T. Pajkossy, “Fractal dimension and fractional power frequency dependent impedance of blocking electrodes” *Electrochim. Acta* 30, 1533-1540 (1985).
